# Supplementary material for: Rainfall Variability and Tidal Inundation Influences on Mangrove Greenness in Karimunjawa National Park, Indonesia
Source: MDPI journal article supplement (doi:10.3390/su14148948), 2022-07-21
Supplement: s1 [file s1]

## Supplementary Material

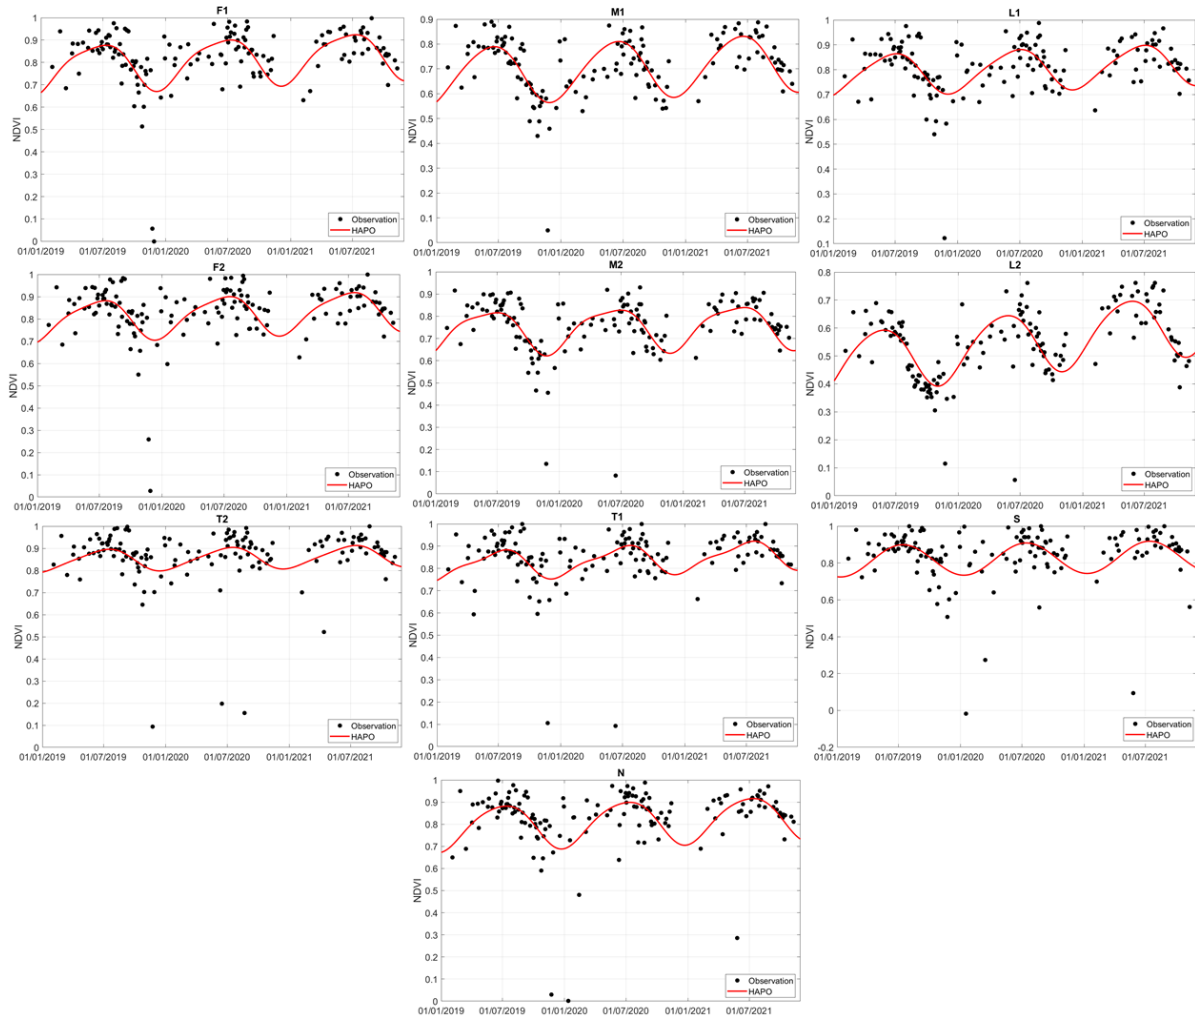

**Figure S1.** Harmonic regression using the HAPO method (solid red line) on scattered NDVI time-series data (black dots) at point F1, F2, M1, M2, L1, L2, N, S, T1, and T2 from January 1, 2019 – December 31, 2021

**Table S1.** Dataset of Sentinel-2 L2A in KNP area used in this study

| Year | Month     | Day                                | Number of Images | Year | Month     | Day                                 | Number of Images |
|------|-----------|------------------------------------|------------------|------|-----------|-------------------------------------|------------------|
| 2019 | January   | -                                  | 0                | 2020 | July      | 2, 5, 7, 10, 20, 22, 25, 30         | 8                |
|      | February  | 3, 26                              | 2                |      | August    | 1, 6, 9, 16, 19, 21, 24, 26, 29, 31 | 10               |
|      | March     | 15                                 | 1                |      | September | 5, 8, 10, 13, 15, 23                | 6                |
|      | April     | 2, 4, 19, 22                       | 4                |      | October   | 3, 5, 13, 25, 28                    | 5                |
|      | May       | 4, 19, 22                          | 3                |      | November  | 4, 7, 12                            | 3                |
|      | June      | 1, 11, 16, 18, 21, 26, 28          | 7                |      | December  | -                                   | 0                |
|      | July      | 1, 11, 13, 16, 18, 21, 23, 31      | 8                | 2021 | January   | -                                   | 0                |
|      | August    | 2, 5, 7, 10, 17, 20, 25, 27, 30    | 9                |      | February  | 7, 27                               | 2                |
|      | September | 4, 6, 9, 14, 21, 26, 29            | 7                |      | March     | 17, 22                              | 2                |
|      | October   | 1, 4, 6, 9, 11, 14, 21, 24, 29, 31 | 10               |      | April     | 3, 8, 13, 21, 26                    | 5                |
|      | November  | 3, 5, 8, 18, 23, 28                | 6                |      | May       | 26, 31                              | 2                |
|      | December  | 18, 28, 30                         | 3                |      | June      | 5, 7, 12, 22                        | 4                |
| 2020 | January   | 12, 17, 27, 29                     | 4                |      | July      | 5, 7, 10, 25, 27, 30                | 6                |
|      | February  | 13                                 | 1                |      | August    | 1, 4, 14, 16, 26                    | 5                |
|      | March     | 4, 7, 14,                          | 3                |      | September | 10, 18, 20, 28, 30                  | 5                |
|      | April     | 3, 8                               | 2                |      | October   | 5, 8, 10, 13, 15                    | 5                |
|      | May       | 6, 16, 21                          | 3                |      | November  | 2, 9                                | 2                |
|      | June      | 10, 12, 15, 25, 27, 30             | 6                |      | December  | -                                   | 0                |

**Table S2.** NDVI at SOS for each sampling point

| F1    | F2    | M1    | M2    | L1    | L2    | N     | S     | T1    | T2    |
|-------|-------|-------|-------|-------|-------|-------|-------|-------|-------|
| -     | -     | -     | -     | -     | -     | -     | 0.778 | -     | -     |
| 0.743 | 0.766 | 0.641 | 0.686 | 0.758 | 0.471 | 0.754 | 0.788 | 0.800 | 0.831 |
| 0.766 | 0.784 | 0.662 | 0.698 | 0.774 | 0.522 | 0.771 | 0.797 | 0.819 | 0.840 |

**Table S3.** NDVI at POS for each sampling point

| F1    | F2    | M1    | M2    | L1    | L2    | N     | S     | T1    | T2    |
|-------|-------|-------|-------|-------|-------|-------|-------|-------|-------|
| 0.877 | 0.882 | 0.789 | 0.816 | 0.864 | 0.593 | 0.882 | 0.899 | 0.884 | 0.896 |
| 0.900 | 0.900 | 0.810 | 0.827 | 0.881 | 0.644 | 0.899 | 0.909 | 0.903 | 0.904 |
| 0.924 | 0.918 | 0.831 | 0.839 | 0.898 | 0.696 | 0.916 | 0.918 | 0.923 | 0.913 |

**Table S4.** NDVI at EOS for each sampling point

| F1    | F2    | M1    | M2    | L1    | L2    | N     | S     | T1    | T2    |
|-------|-------|-------|-------|-------|-------|-------|-------|-------|-------|
| 0.730 | 0.756 | 0.630 | 0.677 | 0.748 | 0.448 | 0.743 | 0.781 | 0.790 | 0.826 |
| 0.753 | 0.774 | 0.651 | 0.688 | 0.765 | 0.500 | 0.760 | 0.791 | 0.810 | 0.834 |
| -     | -     | 0.671 | 0.700 | -     | 0.552 | -     | -     | -     | -     |

**Table S5.** AOS for each sampling point

| F1    | F2    | M1    | M2    | L1    | L2    | N     | S     | T1    | T2    |
|-------|-------|-------|-------|-------|-------|-------|-------|-------|-------|
| 0.207 | 0.177 | 0.225 | 0.194 | 0.163 | 0.201 | 0.194 | 0.170 | 0.131 | 0.098 |
| 0.219 | 0.187 | 0.236 | 0.200 | 0.171 | 0.226 | 0.202 | 0.170 | 0.141 | 0.102 |
| 0.230 | 0.196 | 0.236 | 0.200 | 0.180 | 0.226 | 0.211 | 0.175 | 0.151 | 0.106 |

**Table S6.** SOS, average SOS for each sampling point, and Temporal average SOS in 2019, 2020, and 2021

|                        | F1     | F2    | M1    | M2     | L1    | L2    | N      | S      | T1    | T2     | Temporal Avg SOS |
|------------------------|--------|-------|-------|--------|-------|-------|--------|--------|-------|--------|------------------|
| <b>2019</b>            | -      | -     | -     | -      | -     | -     | -      | Mar 21 | -     | -      | Mar 21           |
| <b>2020</b>            | Feb 1  | Feb 9 | Feb 3 | Jan 17 | Feb 9 | Jan 5 | Feb 22 | Mar 20 | Feb 5 | Feb 24 | Feb 8            |
| <b>2021</b>            | Jan 31 | Feb 8 | Feb 2 | Jan 16 | Feb 8 | Jan 4 | Feb 21 | Mar 20 | Feb 4 | Feb 23 | Feb 7            |
| <b>spatial Avg SOS</b> | Jan 31 | Feb 8 | Feb 2 | Jan 16 | Feb 8 | Jan 4 | Feb 21 | Mar 19 | Feb 4 | Feb 23 |                  |

**Table S7.** POS, average POS for each sampling point, and Temporal average POS in 2019, 2020, and 2021

|                        | F1     | F2     | M1     | M2    | L1    | L2     | N      | S      | T1     | T2     | temporal Avg SOS |
|------------------------|--------|--------|--------|-------|-------|--------|--------|--------|--------|--------|------------------|
| <b>2019</b>            | Jul 12 | Jul 20 | Jun 20 | Jul 2 | Jul 6 | May 28 | Jul 14 | Jul 14 | Jul 25 | Jul 19 | Jul 6            |
| <b>2020</b>            | Jul 11 | Jul 19 | Jun 19 | Jul 1 | Jul 5 | May 27 | Jul 13 | Jul 13 | Jul 24 | Jul 18 | Jul 5            |
| <b>2021</b>            | Jul 11 | Jul 19 | Jun 19 | Jul 1 | Jul 5 | May 27 | Jul 13 | Jul 13 | Jul 24 | Jul 18 | Jul 5            |
| <b>Spatial Avg SOS</b> | Jul 11 | Jul 19 | Jun 19 | Jul 1 | Jul 5 | May 27 | Jul 13 | Jul 13 | Jul 24 | Jul 18 |                  |

**Table S8.** EOS, average EOS for each sampling point, and Temporal average EOS in 2019, 2020, and 2021

|                        | F1     | F2     | M1    | M2    | L1     | L2     | N      | S     | T1     | T2     | Temporal Avg EOS |
|------------------------|--------|--------|-------|-------|--------|--------|--------|-------|--------|--------|------------------|
| <b>2019</b>            | Oct 18 | Oct 23 | Oct 3 | Oct 8 | Oct 12 | Sep 11 | Oct 31 | Nov 7 | Oct 17 | Oct 22 | Oct 14           |
| <b>2020</b>            | Oct 17 | Oct 22 | Oct 2 | Oct 7 | Oct 11 | Sep 10 | Oct 30 | Nov 6 | Oct 16 | Oct 21 | Oct 14           |
| <b>2021</b>            | -      | -      | Oct 2 | Oct 7 | -      | Sep 10 | -      | -     | -      | -      | Sep 25           |
| <b>Spatial Avg EOS</b> | Oct 17 | Oct 22 | Oct 1 | Oct 6 | Oct 11 | Sep 9  | Oct 30 | Nov 6 | Oct 16 | Oct 21 |                  |

**Table S9.** LOS, average LOS for each sampling point, and Temporal average LOS in 2019, 2020, and 2021

|                            | <b>F1</b> | <b>F2</b> | <b>M1</b> | <b>M2</b> | <b>L1</b> | <b>L2</b> | <b>N</b> | <b>S</b> | <b>T1</b> | <b>T2</b> | <b>Temporal<br/>Avg LOS</b> |
|----------------------------|-----------|-----------|-----------|-----------|-----------|-----------|----------|----------|-----------|-----------|-----------------------------|
| <b>2019</b>                | 254       | 251       | 237       | 263       | 240       | 235       | 248      | 231      | 244       | 236       | 243.9                       |
| <b>2020</b>                | 259       | 256       | 242       | 264       | 245       | 249       | 251      | 231      | 254       | 240       | 249.1                       |
| <b>2021</b>                | 265       | 261       | 242       | 264       | 250       | 249       | 255      | 234      | 262       | 244       | 252.6                       |
| <b>Spatial<br/>Avg LOS</b> | 259       | 256       | 240       | 264       | 245       | 244       | 251      | 232      | 253       | 240       |                             |
